# Supplementary material
Source: Research Square preprint supplement (doi:10.21203/rs.3.rs-9451651/v1)
Supplement: Supplementary file 1 [file a69489f65ec8f6f796cb44ce.docx]

# Supplementary Information

Table - Group Summary of EEG bad channels dropped by “pyprep”.

| Group | Total  subjects | Total  dropped | Total Roi  relevant | Median dropped | Min  dropped | Max  dropped | Non-Roi  dropped | Roi relevant share |
| --- | --- | --- | --- | --- | --- | --- | --- | --- |
| HC | 11 | 13 | 5 | 1.0 | 0 | 3 | 8 | 0.38 |
| MDD | 11 | 20 | 2 | 2.0 | 0 | 3 | 18 | 0.1 |

Table - Group Summary of fNIRs bad Pairs dropped based on Scalp Coupling Index.

| **Healthy Id** | **Number**  **Of bad channels** | **Bad**  **Pairs** | **MDD**  **Id** | **Number**  **Of bad channels** | **Bad**  **Pairs** |
| --- | --- | --- | --- | --- | --- |
| **205511** | 4 | S5_D7;S7_D7 | **pf02** | 0 | - |
| **212942** | 8 | S1_D3;S5_D7;S7_D5;S7_D7 | **pf03** | 4 | S1_D3;S3_D1 |
| **215602** | 0 | - | **pf04** | 6 | S5_D7;S7_D5;S7_D7 |
| **215713** | 0 | - | **pf05** | 4 | S5_D7;S7_D7 |
| **215732** | 0 | - | **pf06** | 6 | S5_D7;S5_D8;S8_D5 |
| **215735** | 0 | - | **pf07** | 2 | S1_D3 |
| **215776** | 0 | - | **pf08** | 0 | - |
| **215823** | 2 | S7_D7 | **pf09** | 14 | S3_D1;S3_D3;S5_D7;  S5_D8;S7_D5;S7_D7;S8_D5 |
| **215864** | 0 | - | **pf10** | 12 | S1_D2;S2_D1;S2_D4;  S4_D2;S6_D7;S6_D8 |
| **215901** | 16 | S1_D1;S1_D3;S3_D1;S5_D5;  S5_D7;S7_D5;S7_D7;S8_D5 | **pf11** | 0 | - |
| **216032** | 0 | - | **pf12** | 8 | S5_D7;S7_D6;S7_D7;S8_D6 |

Table – Participant characteristics.

| **Characteristic** | **Healthy**  **controls** | **MDD**  **patients** | **Statistics** |
| --- | --- | --- | --- |
| **N** | 11 | 11 | - |
| **Sex (M/F)** | 8/3 | 8/3 | - |
| **Age (years) median,**  **range** | 28, (19,55) | 30, (18,54) | Mann–Whitney U = 68.0, p = 0.646 |
| **BDI-II score median,**  **range** | 2, (0,11) | 19, (4,38) | Mann–Whitney U = 116.5, p = 0.0002 |

Table – Alpha band relative EEG power mean, standard deviation and median of healthy controls within the ROIs.

| **ROI** | **Mean Healthy**  **controls** | **Std Healthy**  **controls** | **Median Healthy**  **controls** |
| --- | --- | --- | --- |
| **LMFC** | 0.3873 | 0.1268 | 0.3743 |
| **LT** | 0.3503 | 0.0968 | 0.2988 |
| **PFC** | 0.4136 | 0.1296 | 0.4349 |
| **PP** | 0.5712 | 0.1520 | 0.5613 |
| **RMFC** | 0.3785 | 0.1182 | 0.4364 |
| **RT** | 0.3430 | 0.1158 | 0.3543 |

Table - Alpha band relative EEG power mean, standard deviation and median of MDD group within the ROIs.

| **ROI** | **Mean MDD** | **Std MDD** | **Median MDD** |
| --- | --- | --- | --- |
| **LMFC** | 0.2706 | 0.1313 | 0.2655 |
| **LT** | 0.2595 | 0.1154 | 0.2799 |
| **PFC** | 0.2628 | 0.1405 | 0.2525 |
| **PP** | 0.3682 | 0.1719 | 0.3701 |
| **RMFC** | 0.2836 | 0.1451 | 0.2728 |
| **RT** | 0.2502 | 0.1179 | 0.2273 |

Table –EEG Brunner–Munzel test results for group differences between the two groups, together with the corresponding permutation-based Brunner–Munzel p-values.

| **ROI** | **BM-stat** | **BM-p value**  **uncorrected** | **BM significance**  **uncorrected** | **Permuted**  **p-value** | **Permuted**  **significance** |
| --- | --- | --- | --- | --- | --- |
| **LMFC** | -2.0730 | 0.0530 | FALSE | 0.0578 | FALSE |
| **LT** | -2.3811 | 0.0311 | TRUE | 0.0344 | TRUE |
| **PFC** | -2.8730 | 0.0094 | TRUE | 0.0175 | TRUE |
| **PP** | -3.5938 | 0.0018 | TRUE | 0.0064 | TRUE |
| **RMFC** | -1.6124 | 0.1229 | FALSE | 0.1229 | FALSE |
| **RT** | -1.8922 | 0.0730 | FALSE | 0.0775 | FALSE |

Table - Descriptive statistics of oxyhemoglobin fALFF values for each channel in the healthy control and MDD groups, including sample size, mean, standard deviation, and median.

| **channel** | **n_HC** | **n_MDD** | **mean_HC** | **std_HC** | **mean_MDD** | **std_MDD** | **median_HC** | **median_MDD** |
| --- | --- | --- | --- | --- | --- | --- | --- | --- |
| **S5_D8 hbo** | 11 | 8 | 0.5560 | 0.0879 | 0.6325 | 0.0681 | 0.5537 | 0.6434 |
| **S3_D1 hbo** | 10 | 10 | 0.5418 | 0.0899 | 0.5884 | 0.1058 | 0.5329 | 0.6122 |
| **S8_D5 hbo** | 10 | 8 | 0.5417 | 0.1043 | 0.6289 | 0.0944 | 0.5283 | 0.6324 |
| **S3_D3 hbo** | 11 | 10 | 0.5405 | 0.0875 | 0.5865 | 0.0942 | 0.5618 | 0.6049 |
| **S1_D3 hbo** | 9 | 10 | 0.5470 | 0.0847 | 0.5934 | 0.0828 | 0.5554 | 0.6168 |
| **S2_D4 hbo** | 11 | 11 | 0.5209 | 0.0866 | 0.5664 | 0.1209 | 0.53517 | 0.6252 |
| **S1_D2 hbo** | 11 | 11 | 0.5134 | 0.0952 | 0.5589 | 0.1104 | 0.51249 | 0.5913 |
| **S1_D1 hbo** | 10 | 10 | 0.5416 | 0.0910 | 0.5951 | 0.0691 | 0.54109 | 0.6099 |
| **S3_D4 hbo** | 11 | 11 | 0.5532 | 0.0800 | 0.5904 | 0.1242 | 0.56980 | 0.6287 |
| **S8_D6 hbo** | 11 | 10 | 0.5303 | 0.0950 | 0.5818 | 0.1245 | 0.52632 | 0.5948 |
| **S2_D1 hbo** | 11 | 11 | 0.5214 | 0.0910 | 0.5577 | 0.1231 | 0.51704 | 0.6099 |
| **S6_D8 hbo** | 11 | 11 | 0.5518 | 0.0912 | 0.5870 | 0.1015 | 0.53511 | 0.6155 |
| **S7_D6 hbo** | 11 | 10 | 0.532 | 0.0930 | 0.5936 | 0.1099 | 0.53008 | 0.6041 |
| **S7_D5 hbo** | 9 | 8 | 0.5457 | 0.1007 | 0.6099 | 0.0739 | 0.53553 | 0.6071 |
| **S5_D5 hbo** | 10 | 11 | 0.5460 | 0.0973 | 0.5891 | 0.1009 | 0.55829 | 0.6072 |
| **S4_D3 hbo** | 11 | 11 | 0.5530 | 0.0948 | 0.5824 | 0.0996 | 0.56093 | 0.6109 |
| **S4_D2 hbo** | 11 | 11 | 0.5318 | 0.1022 | 0.5669 | 0.0993 | 0.52227 | 0.5850 |
| **S6_D7 hbo** | 11 | 11 | 0.5559 | 0.0969 | 0.5820 | 0.1039 | 0.57717 | 0.54701 |

Table - Channel-wise Brunner–Munzel test results for group differences in oxyhemoglobin fALFF between the HC and MDD groups, including the BM test statistic, uncorrected p-value, permutation based two-sided p-value, and significance at α = 0.05.

| **channel** | **bm_stat** | **bm_p** | **perm_p_two_sided** | **perm_sig_0.05** |
| --- | --- | --- | --- | --- |
| **S5_D8 hbo** | 2.3941 | 0.0288 | 0.04062 | TRUE |
| **S3_D1 hbo** | 1.5491 | 0.1424 | 0.13938 | FALSE |
| **S8_D5 hbo** | 1.5368 | 0.1438 | 0.14302 | FALSE |
| **S3_D3 hbo** | 1.4814 | 0.1595 | 0.15030 | FALSE |
| **S1_D3 hbo** | 1.4298 | 0.1708 | 0.16547 | FALSE |
| **S2_D4 hbo** | 1.3775 | 0.1868 | 0.17851 | FALSE |
| **S1_D2 hbo** | 1.2639 | 0.2240 | 0.21233 | FALSE |
| **S1_D1 hbo** | 1.2443 | 0.2294 | 0.21942 | FALSE |
| **S3_D4 hbo** | 1.1857 | 0.2540 | 0.23819 | FALSE |
| **S8_D6 hbo** | 1.1348 | 0.2714 | 0.25615 | FALSE |
| **S2_D1 hbo** | 1.1153 | 0.2810 | 0.26375 | FALSE |
| **S6_D8 hbo** | 1.0754 | 0.2950 | 0.28273 | FALSE |
| **S7_D6 hbo** | 1.0609 | 0.3035 | 0.289754 | FALSE |
| **S7_D5 hbo** | 1.0644 | 0.3050 | 0.286274 | FALSE |
| **S5_D5 hbo** | 0.9236 | 0.3672 | 0.347033 | FALSE |
| **S4_D3 hbo** | 0.7943 | 0.4365 | 0.421911 | FALSE |
| **S4_D2 hbo** | 0.7806 | 0.4442 | 0.432411 | FALSE |
| **S6_D7 hbo** | 0.2794 | 0.78289 | 0.781024 | FALSE |


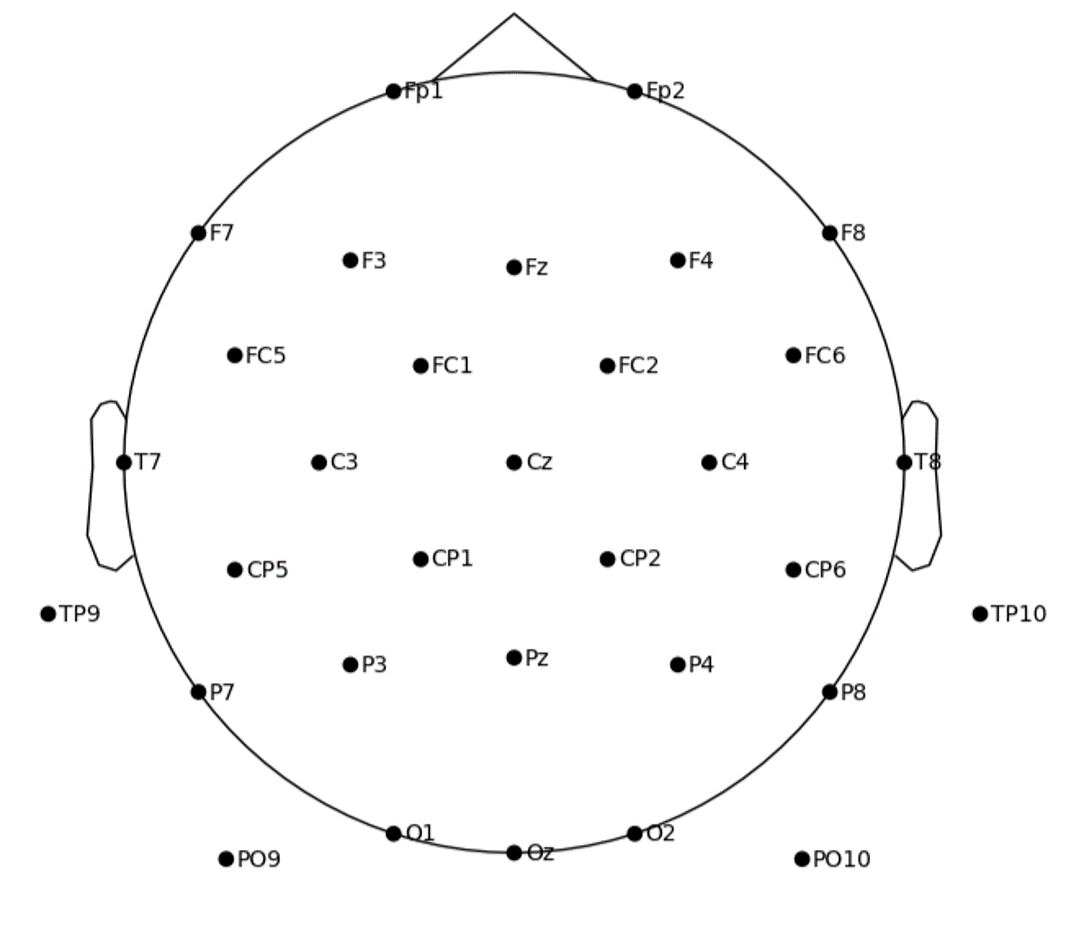

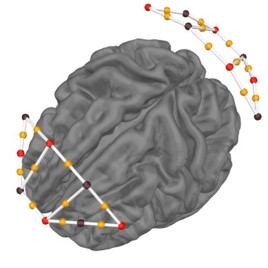


Figure 1- Left: EEG electrodes position. (Source: EEGLAB) , right: §D model of the fNIRS channels (yellow),detectors (purple) and sources (red) (source: MNE Python).


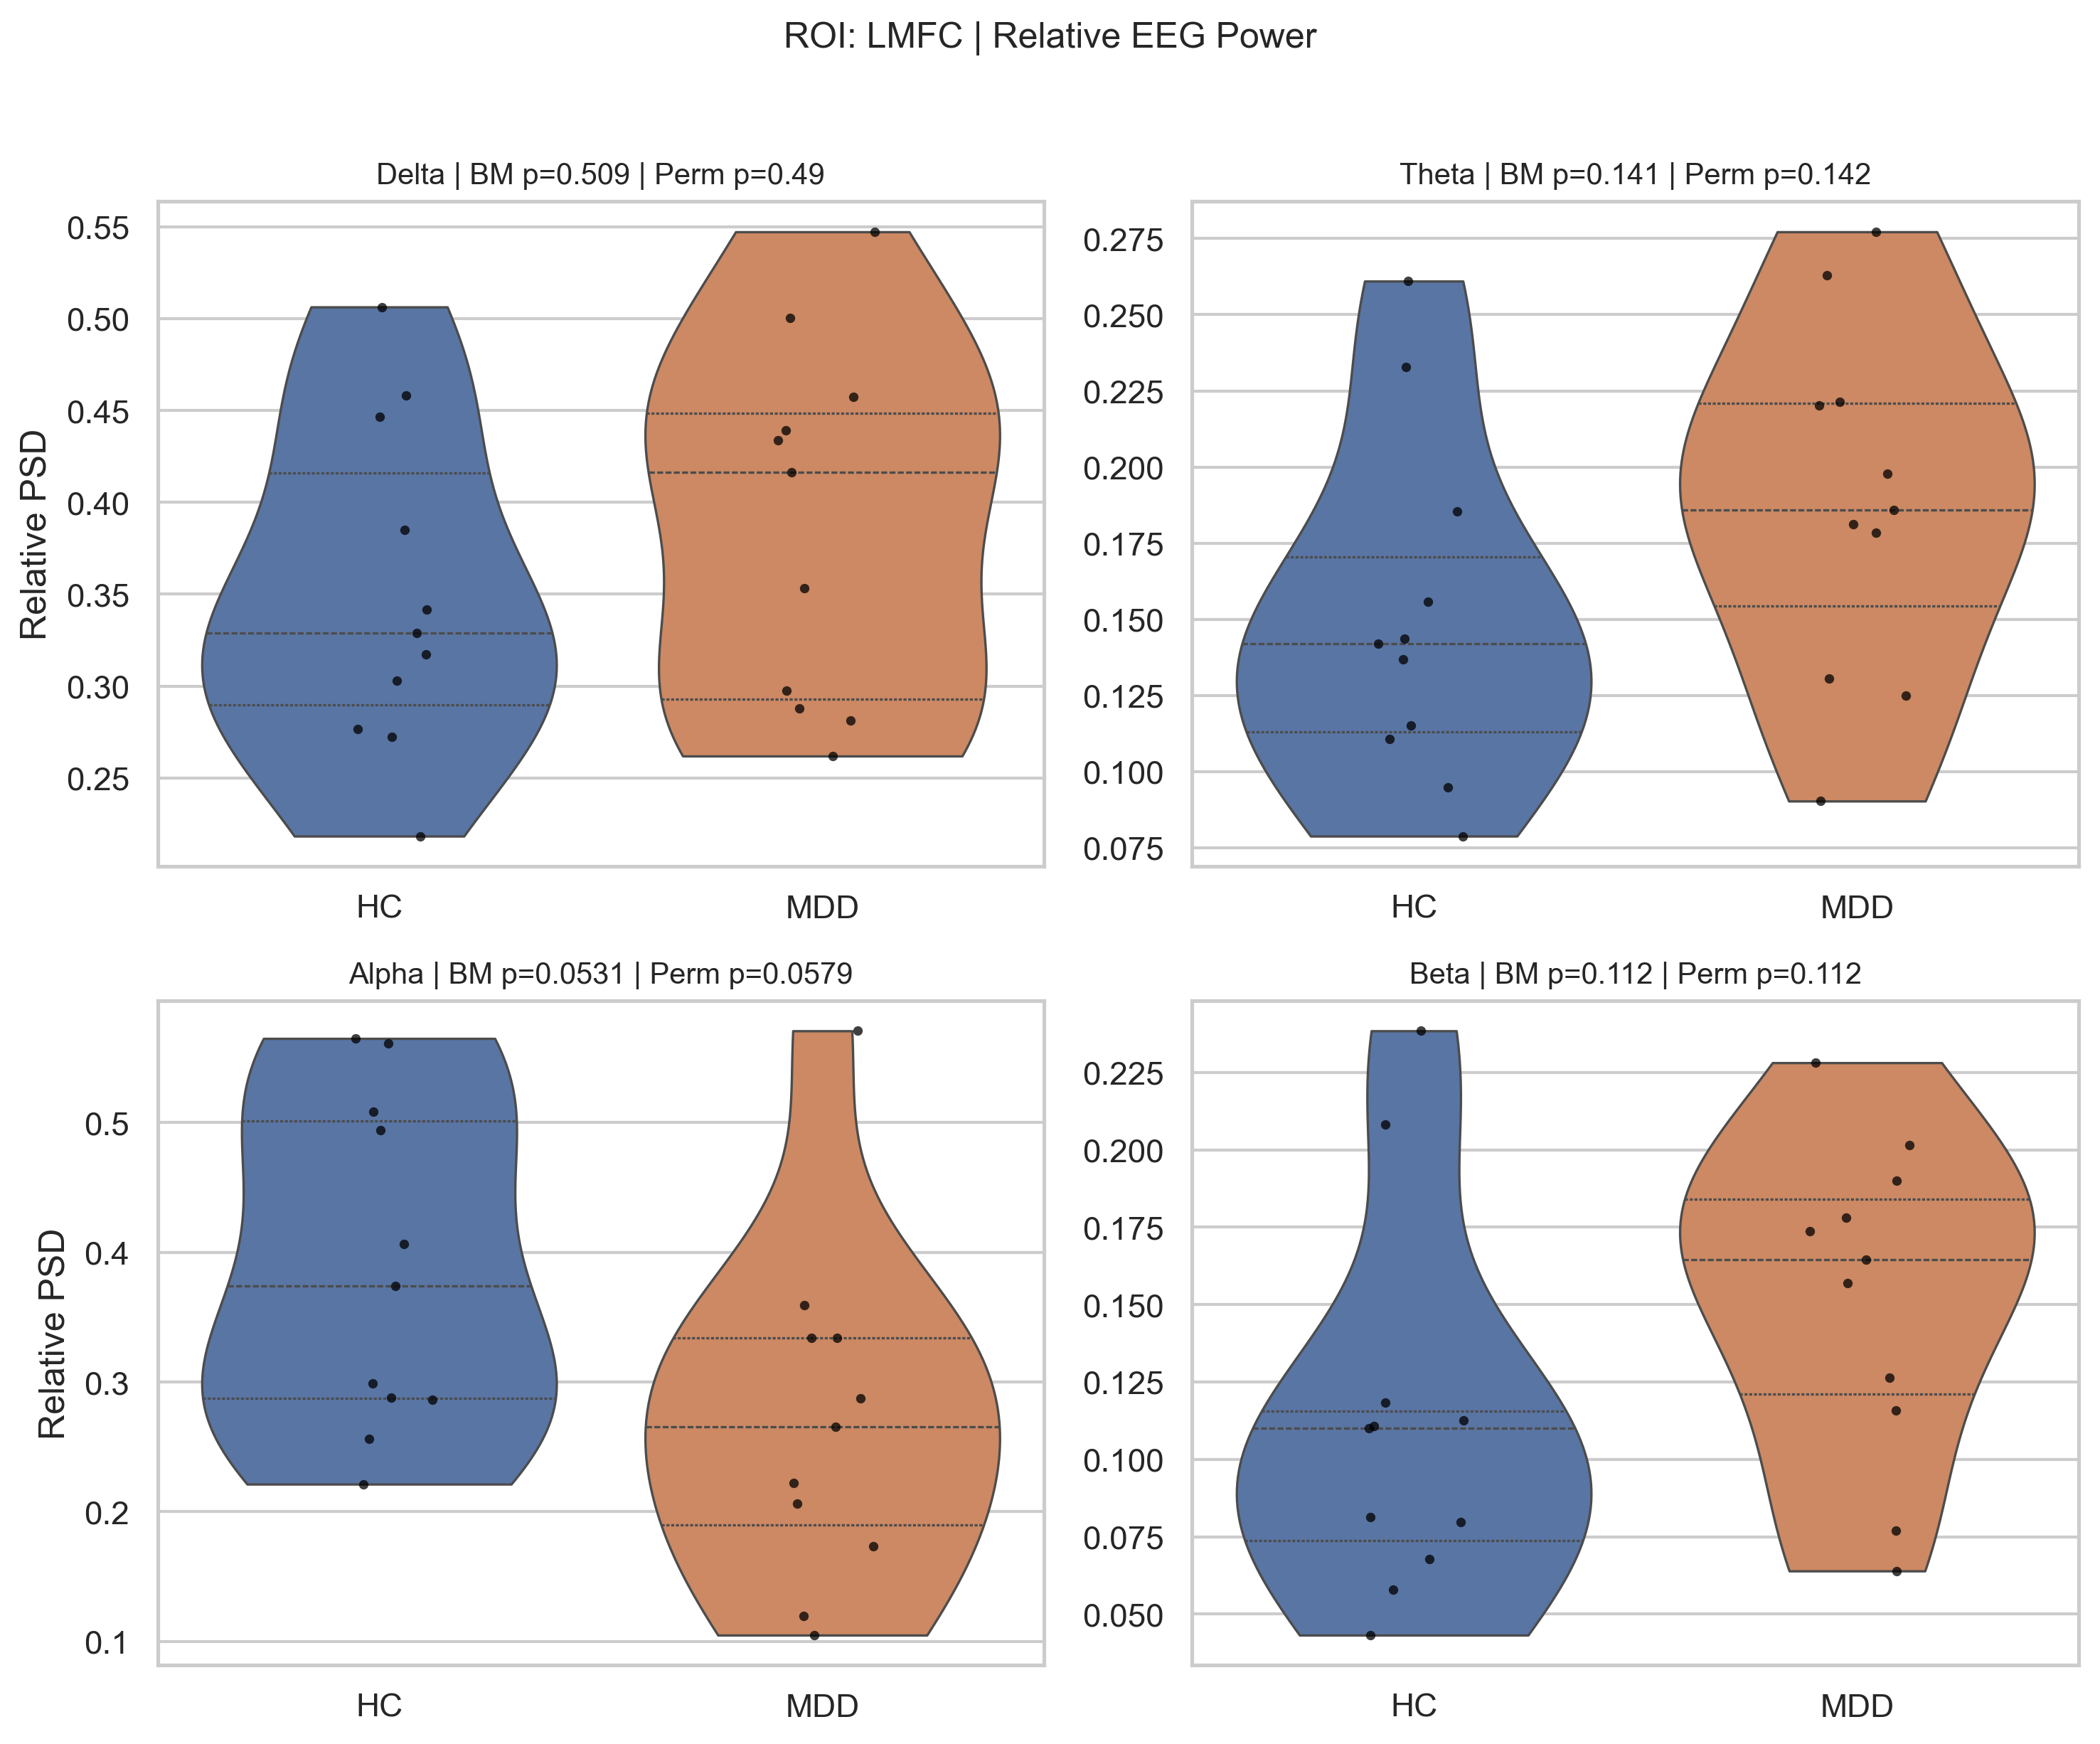


Figure - Violin plots of relative EEG power in the LMFC region for the delta, theta, alpha, and beta bands in healthy controls (HC) and patients with major depressive disorder (MDD).


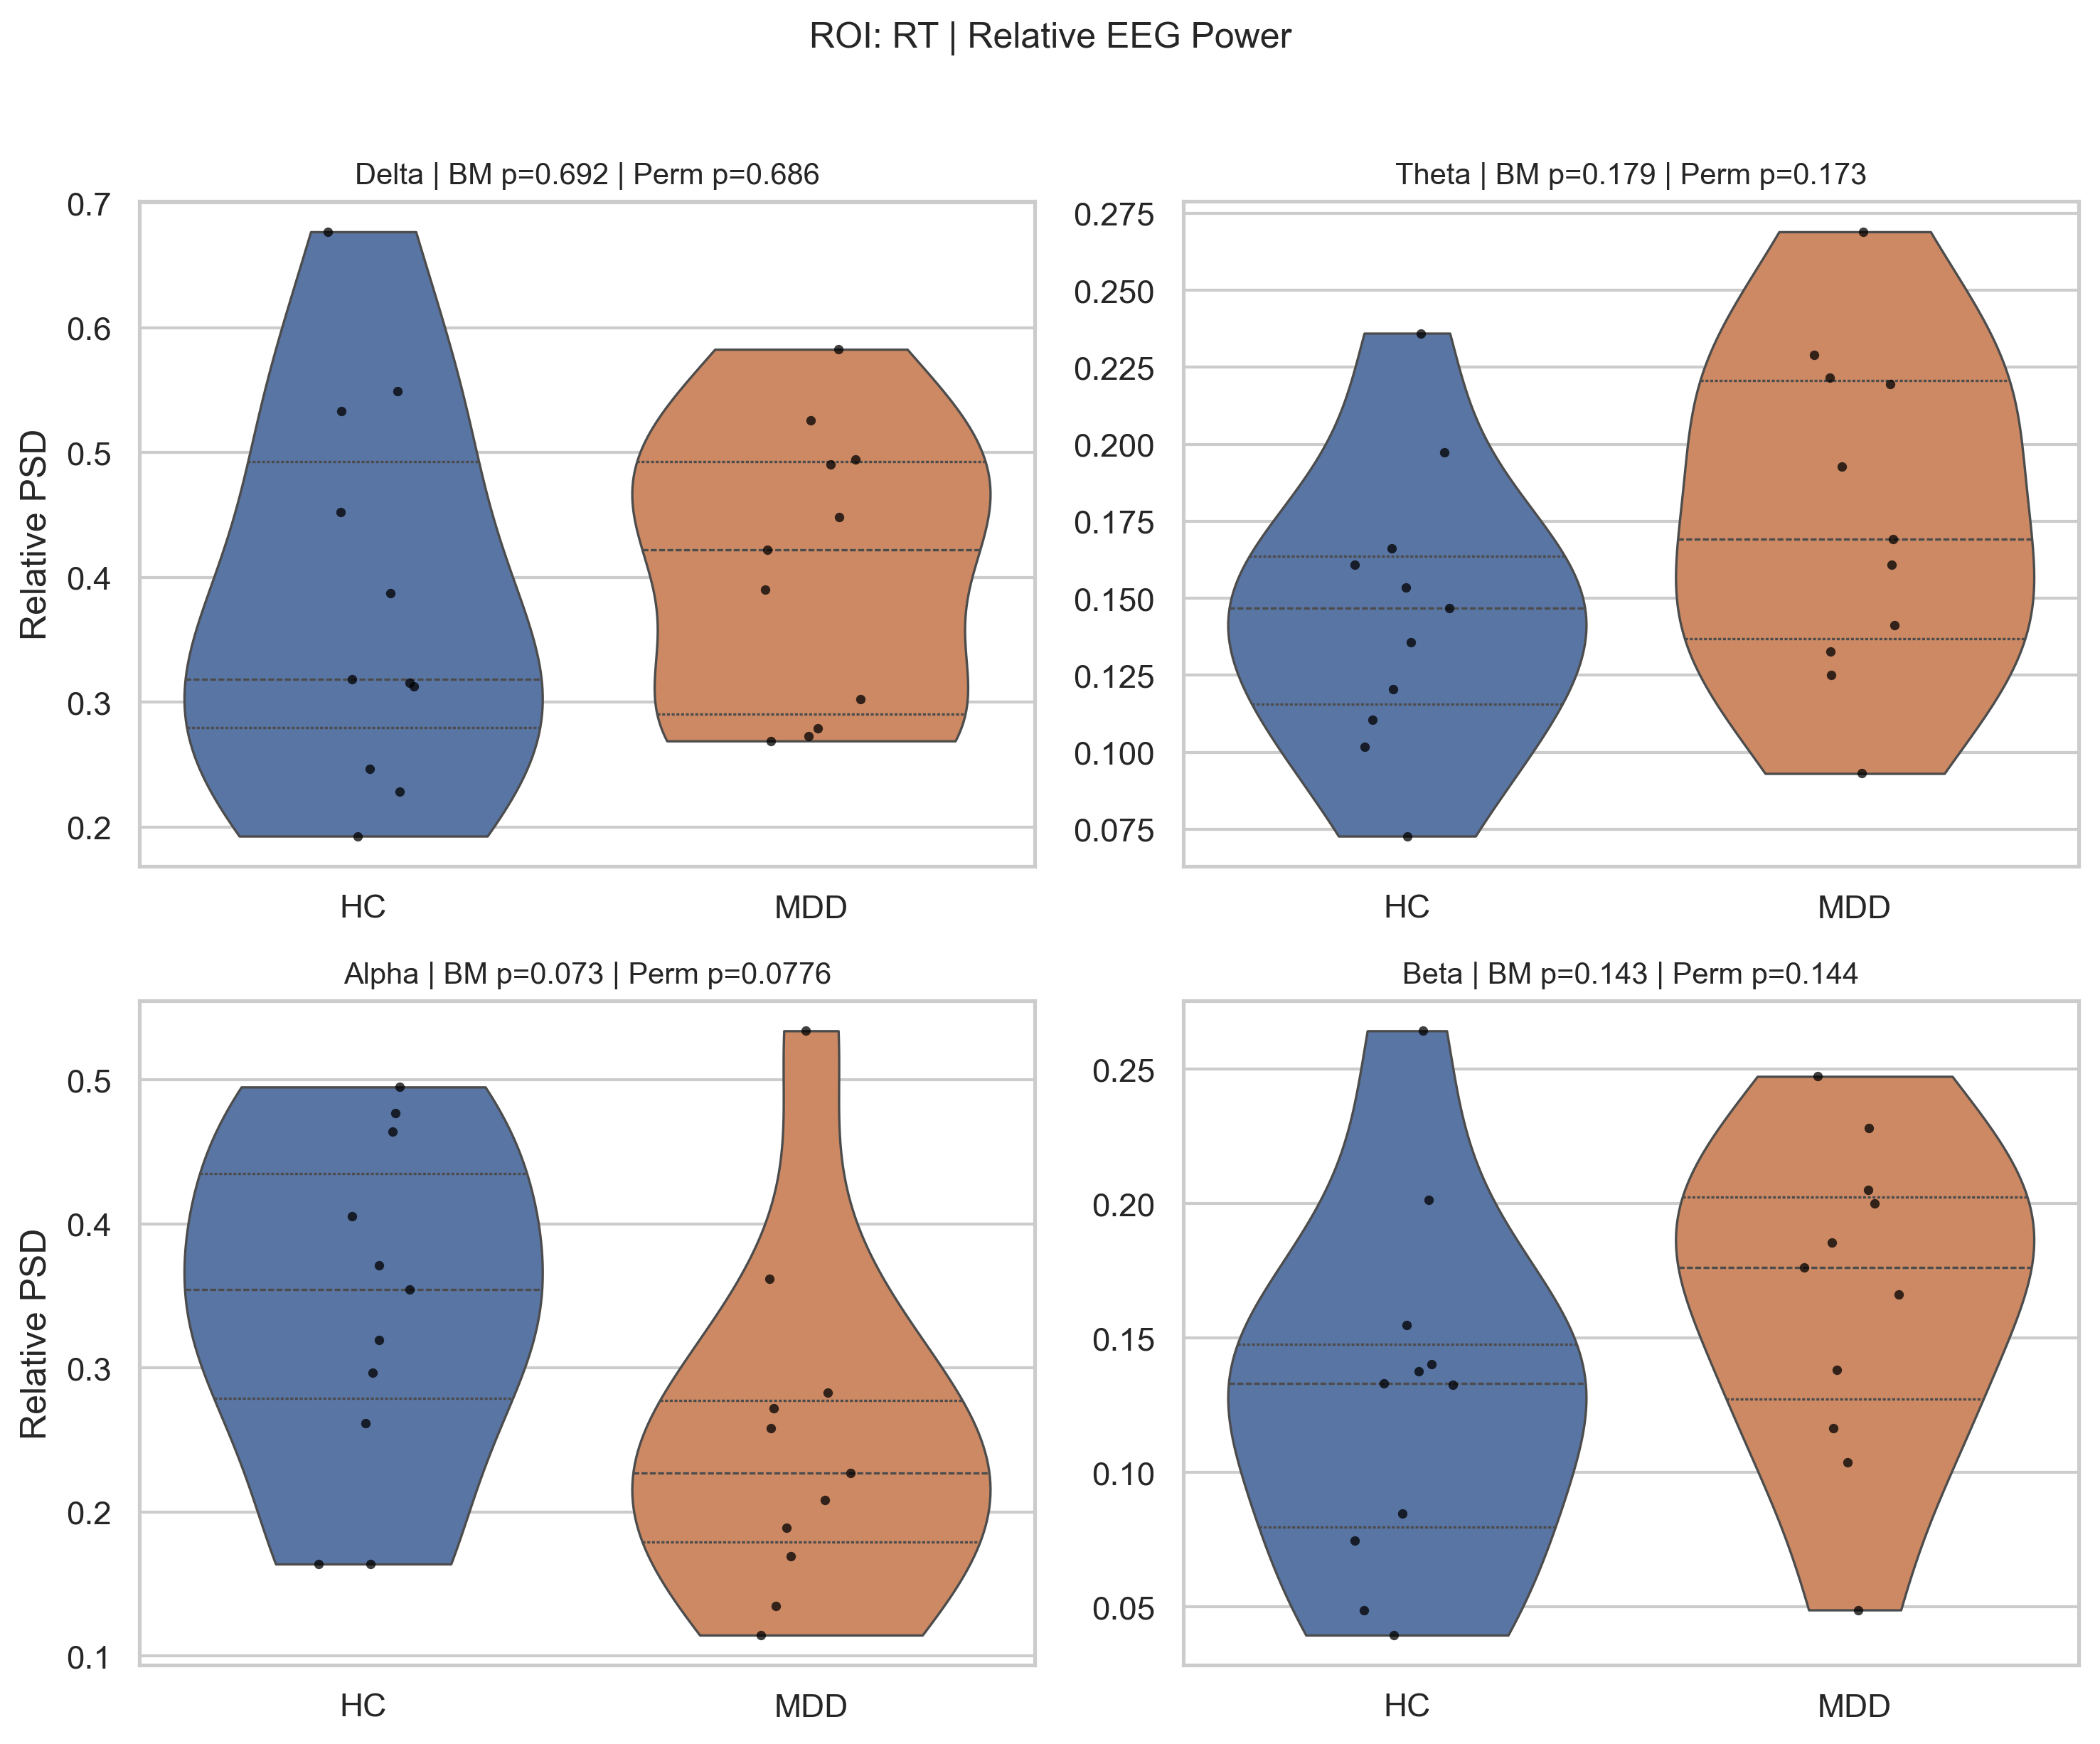


Figure 3- Violin plots of relative EEG power in the RT region for the delta, theta, alpha, and beta bands in healthy controls (HC) and patients with major depressive disorder (MDD).


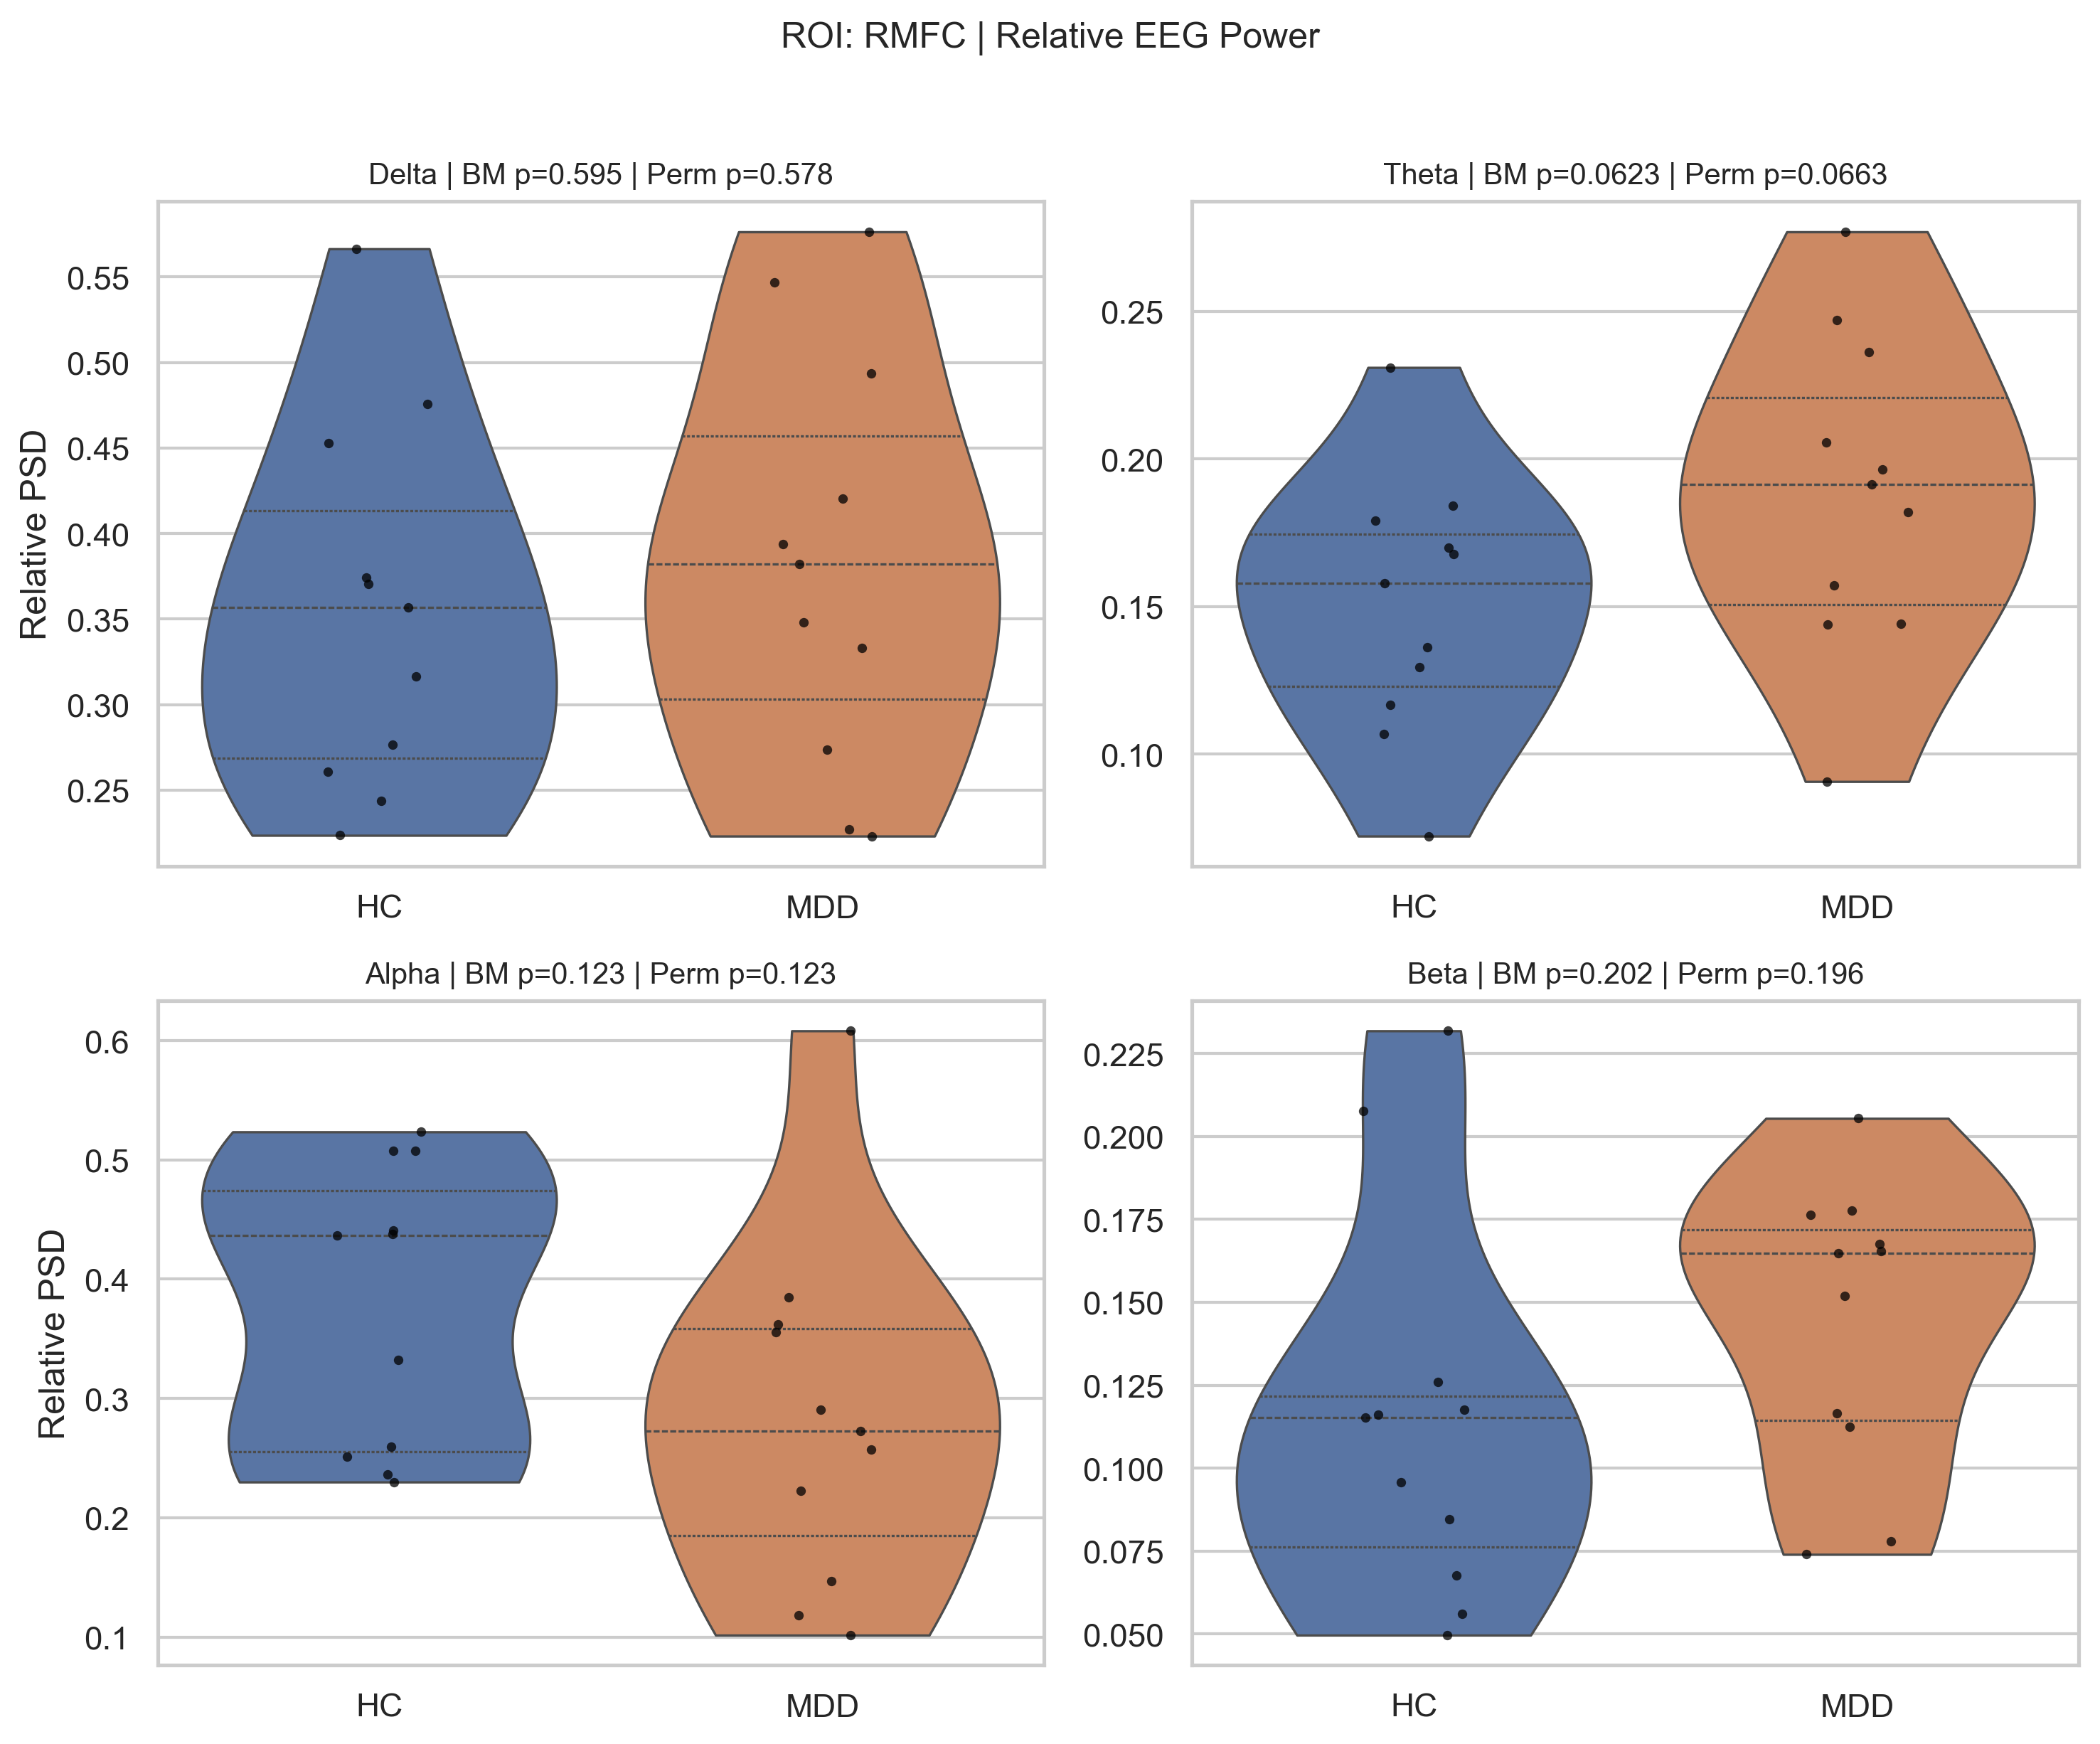


Figure - Violin plots of relative EEG power in the RMFC region for the delta, theta, alpha, and beta bands in healthy controls (HC) and patients with major depressive disorder (MDD).


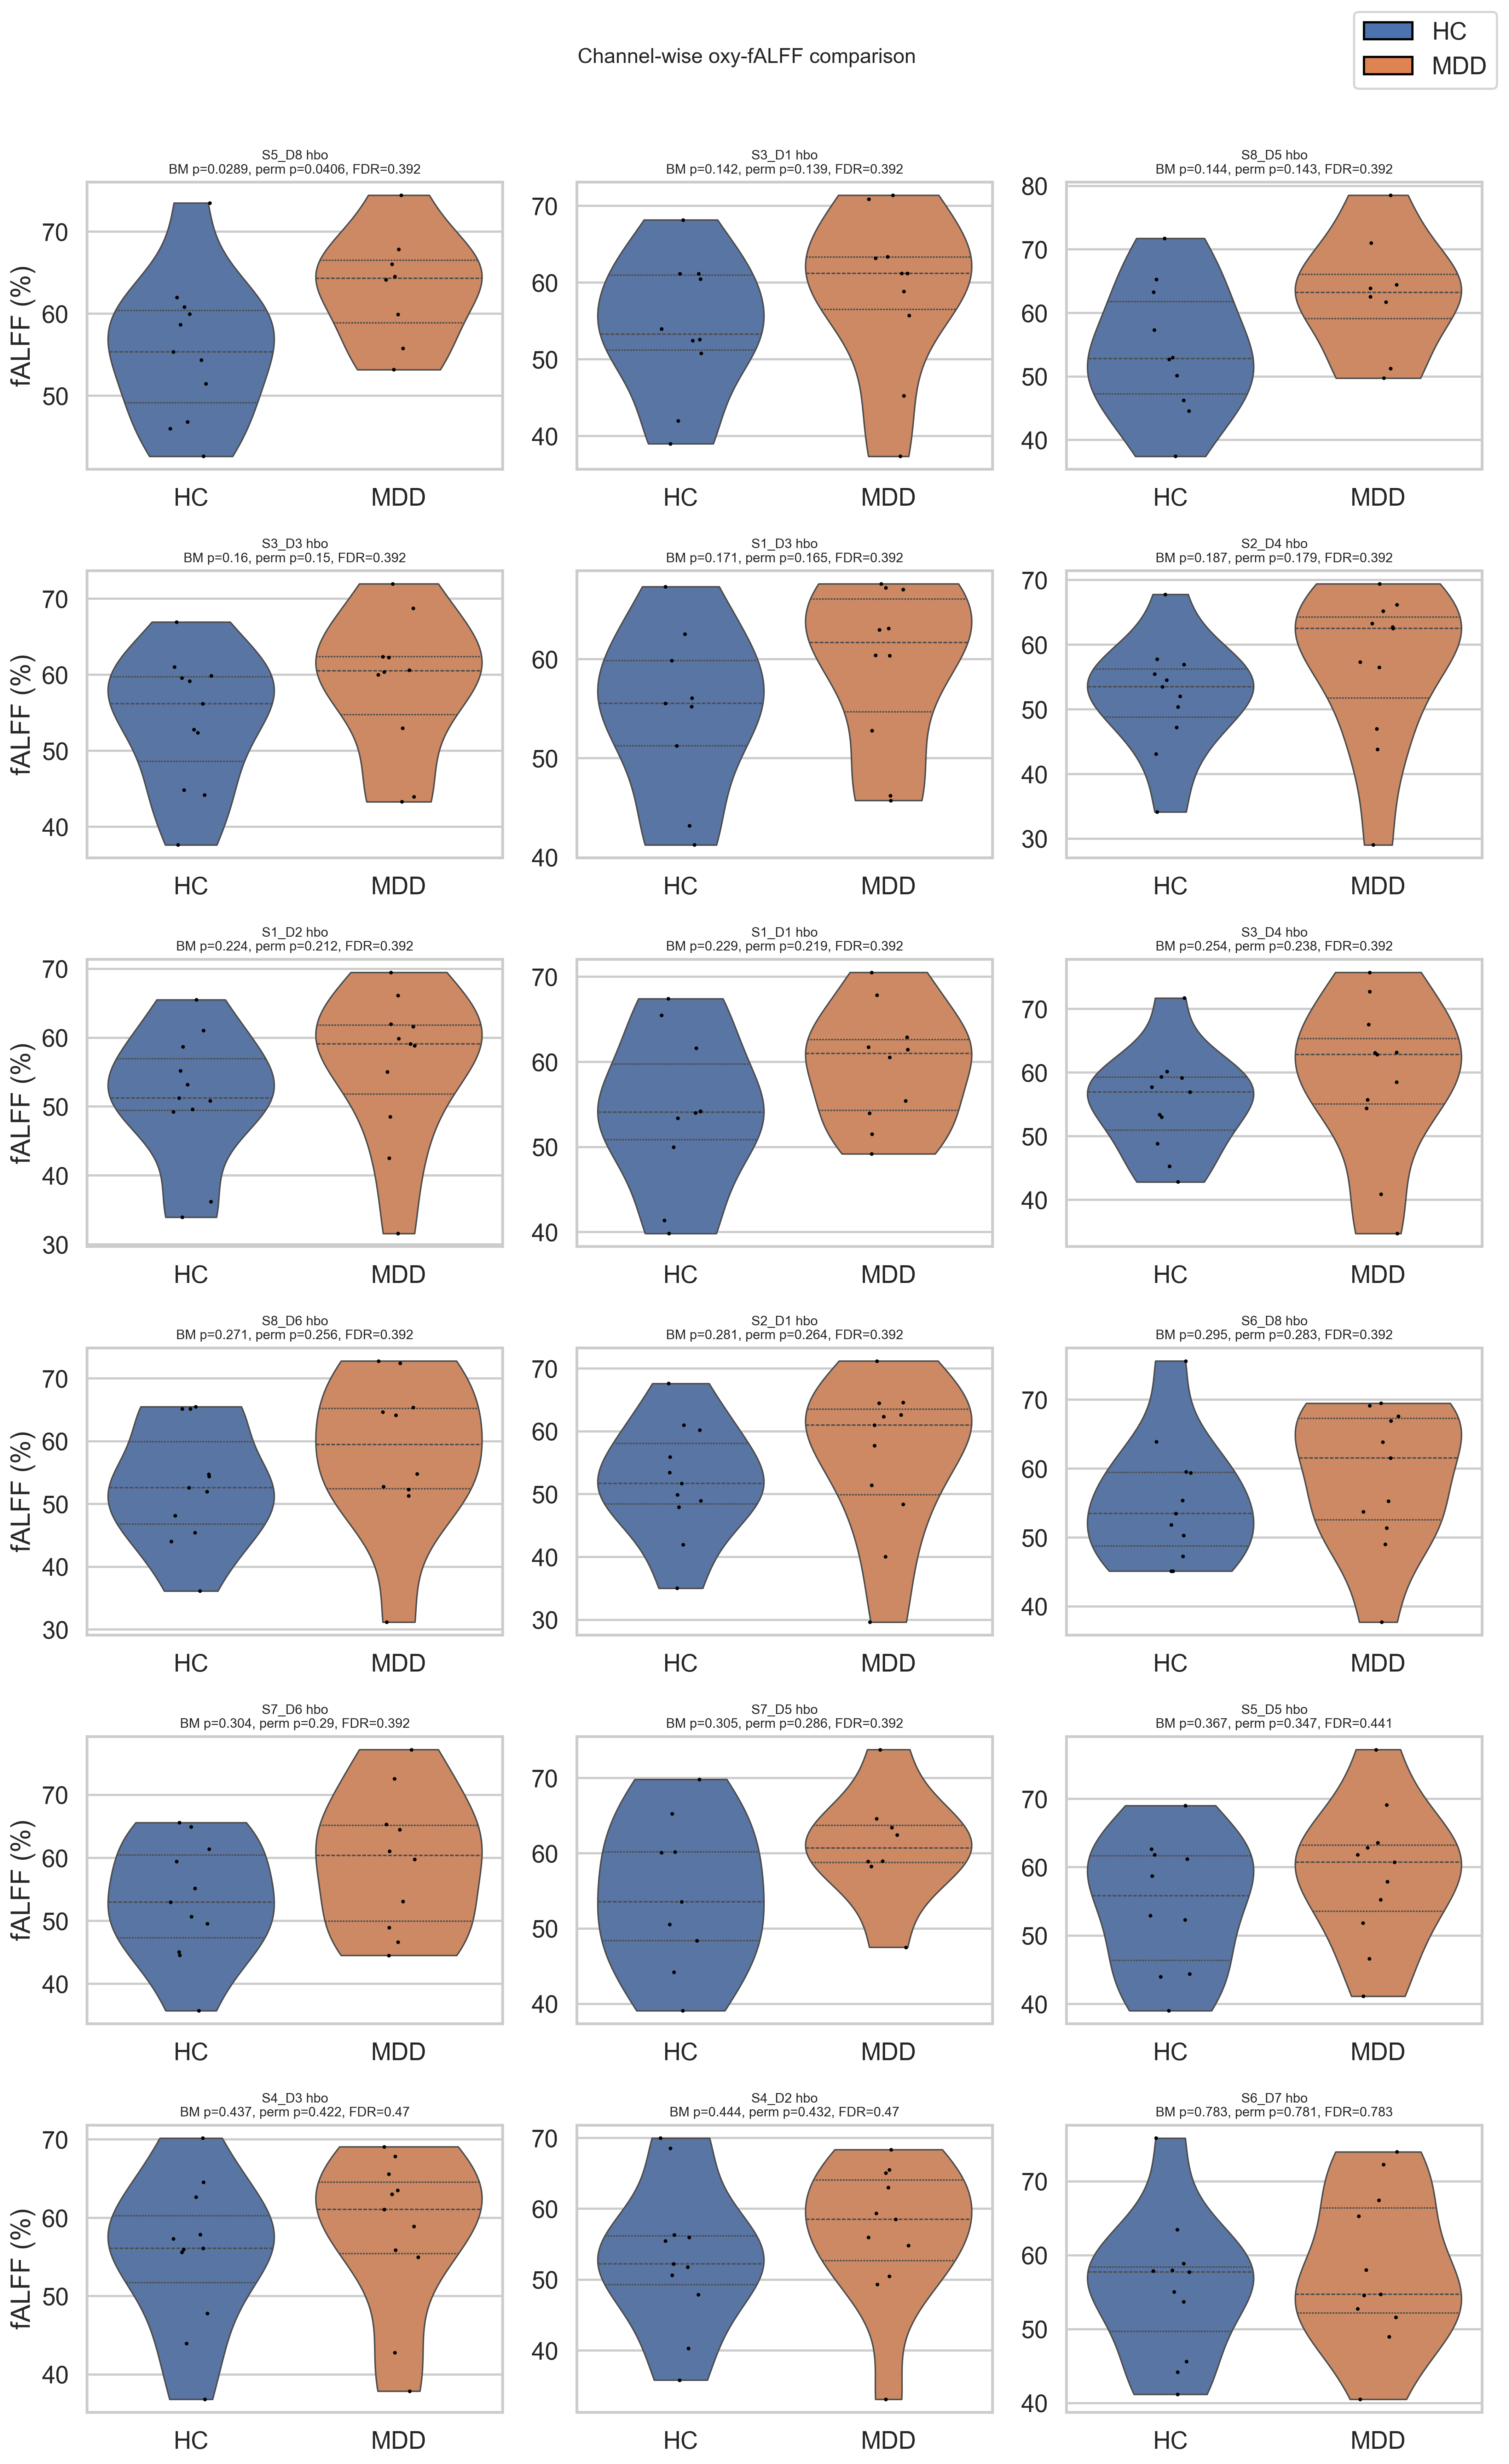


Figure - Channel-wise comparison of oxyhemoglobin fALFF (%) between healthy controls and patients with major depressive disorder.
